# Supplementary material for: A novel 3-hydroxychromone fluorescent probe for hydrogen sulfide based on an excited-state intramolecular proton transfer mechanism
Source: Royal Society of Chemistry journal article supplement (doi:10.1039/c8nj01626g), 2018-01-01
Supplement: c8nj01626g1.pdf [file c8nj01626g1.pdf]

## Supporting Information

# **A novel 3-hydroxychromone fluorescence probe for hydrogen sulfide based on an excited-state intramolecular proton transfer mechanism**

Jing-Jing Liu, Xiang-Zhu Chen, Yuan-Yuan Zhang, Gui Gao, Xue-Yan Zhang, Shi-Cong Hou\*, Yuxia

Hou\*

College of Science, China Agricultural University, Beijing, 100193, P.R. China.

## **Contents**

- 1. Spectra**
- 2. Reaction mechanism**
- 3. Detection limit**
- 4. MTT assay**
- 5.  $^1\text{H}$  NMR,  $^{13}\text{C}$  NMR and HRMS analyses**
- 6. Table S1**

## 1. Spectra

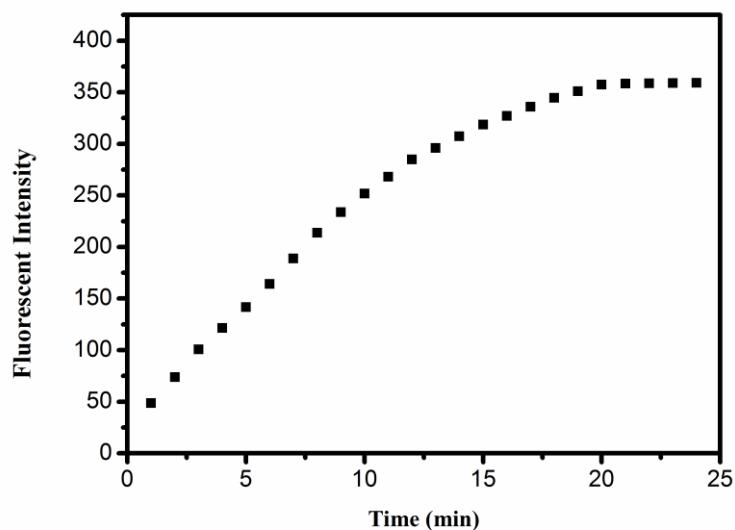

**Fig. S1** Time-dependent fluorescent intensity changes of probe A ( $20\mu\text{M}$ ) at 537nm upon addition of NaSH( $200\mu\text{M}$ ) in PBS buffer (20 mM, pH 7.4) with 20% DMSO and 3 mM CTAB at 37 °C.

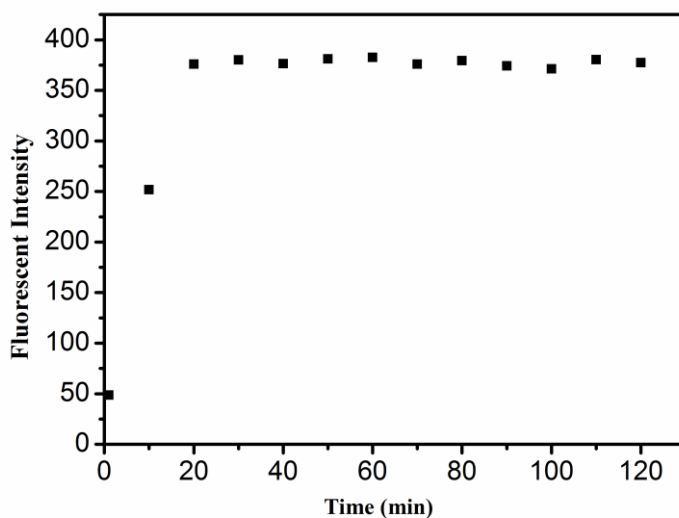

**Fig. S2** The photo-stability of probe A. The fluorescent change at 537nm of probe A ( $20\mu\text{M}$ ) upon addition of NaSH( $200\mu\text{M}$ ) in PBS buffer (20 mM, pH 7.4) with 20% DMSO and 3 mM CTAB at 37 °C.

## 2. Reaction mechanism

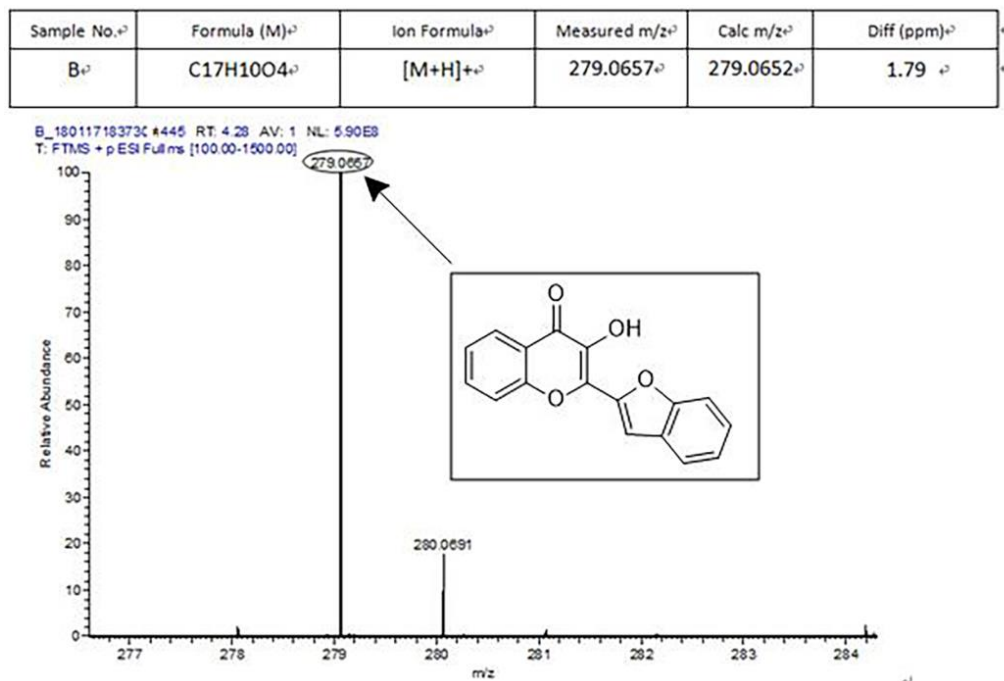

**Fig. S3** HRMS spectrum (ESI negative ion mode) of probe **A** after treatment with NaHS.

## 3. Detection limit

The physiological relevant H<sub>2</sub>S concentration is estimated ranging from nano- to millimolar levels.<sup>1</sup> The detection limit of probe **A** for H<sub>2</sub>S is 49 nM, which falls well within this range. The detection limit was calculated based on the method reported in the previous literature.<sup>2</sup> The fluorescence emission spectrum of probe **A** was measured by three times and the standard deviation of blank measurement was achieved. The fluorescence intensity at 537 nm was plotted as a concentration of H<sub>2</sub>S. The detection limit was calculated by using detection limit  $3\sigma/k$ : Where  $\sigma$  is the standard deviation of blank measurement;  $k$  is the slope between the fluorescence intensity versus H<sub>2</sub>S concentration.

## Reference

- [1] (a) J. Furne, A. Saeed, and M. D. Levitt, *Am. J. Physiol.*, **2008**, 295, R1479; (b) Y. Han, J. Qin, X. Chang, Z. Yang, and J. Du, *Cell. Mol. Neurobiol.*, **2006**, 26, 101.
- [2] B. Zhu, C. Gao, Y. Zhao, C. Liu, Y. Li, Q. Wei, Z. Ma, B. Du, X. Zhang, *Chem. Commun.* **2011**, 47, 8656.

#### 4. MTT assay

*In-vitro* cytotoxicity was measured using the colorimetric methyl thiazolyl tetrazolium (MTT) assay in MDBK cells. Cells were seeded in a 96-well plate and allowed to adhere for 24 h. Subsequently, the cells were incubated with different concentrations of probe A (0, 5, 10, 20, 40, or 80  $\mu\text{M}$ , containing 1% DMSO) for 24 h. Finally, the viabilities of the MDBK cells in the presence of probe A were assessed using MTT cytotoxicity assays.

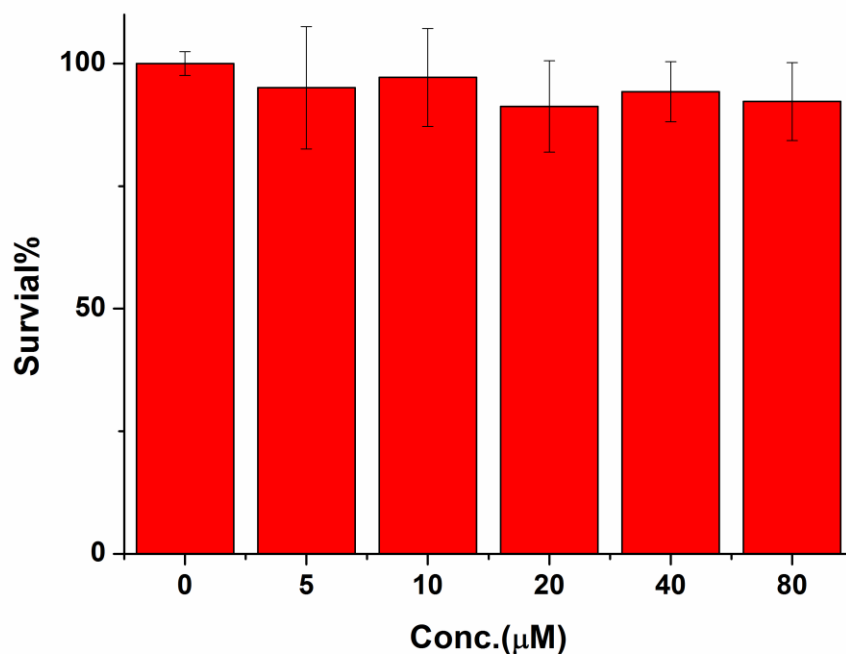

**Fig. S4** Percentage of viable MDBK cells after incubation with different concentrations of probe A for 24 h.

#### 5. $^1\text{H}$ NMR, $^{13}\text{C}$ NMR and HRMS analyses

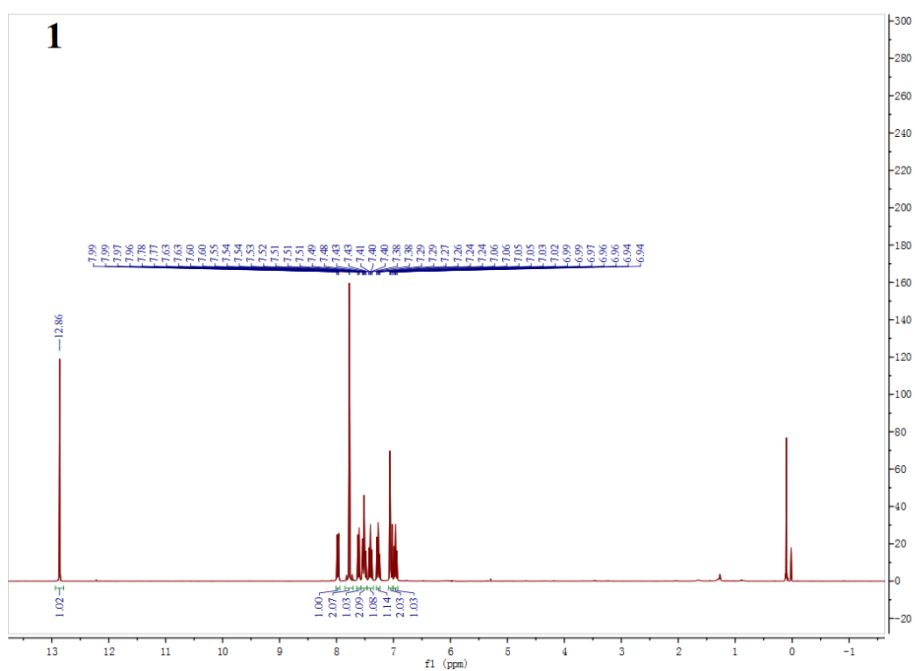

$^1\text{H}$  NMR spectrum of compound 1 in  $\text{CDCl}_3$ .

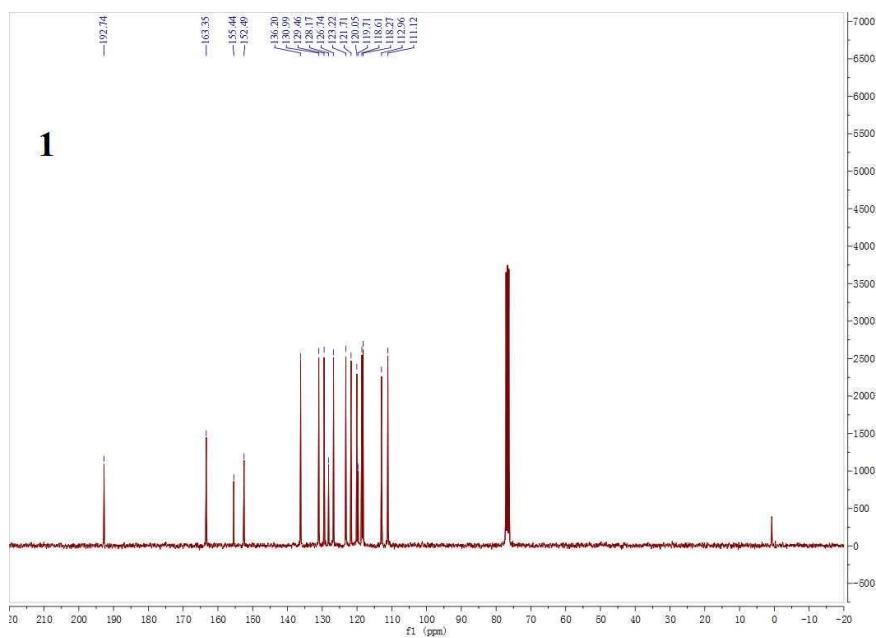

$^{13}\text{C}$  NMR spectrum of compound 1 in  $\text{CDCl}_3$ .

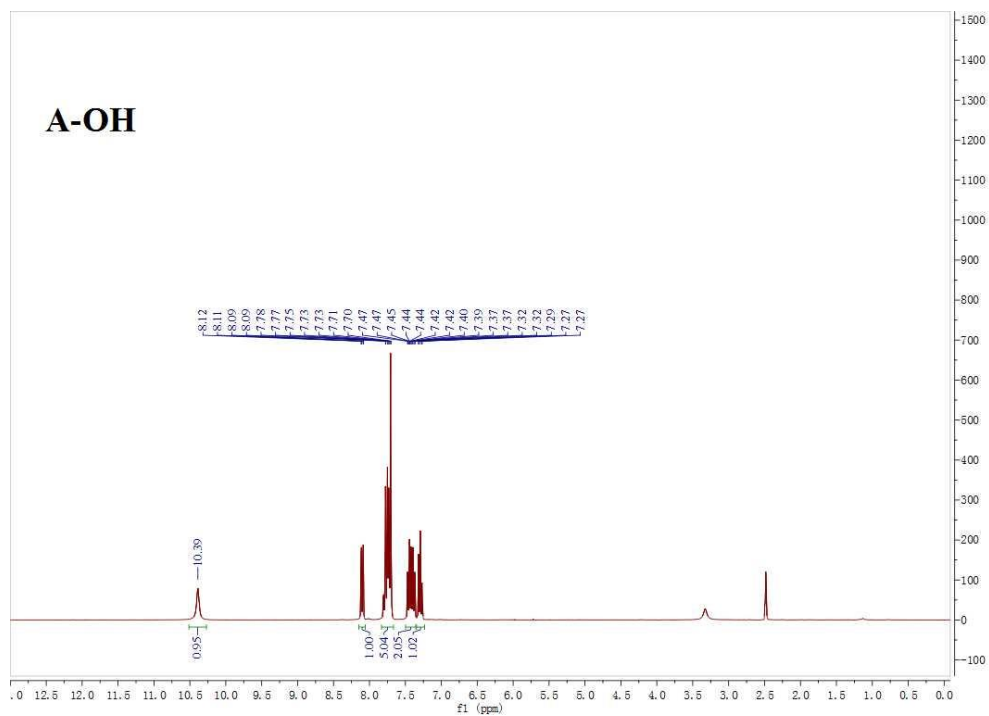

$^1\text{H}$  NMR spectrum of **A-OH** in  $\text{DMSO-d}_6$ .

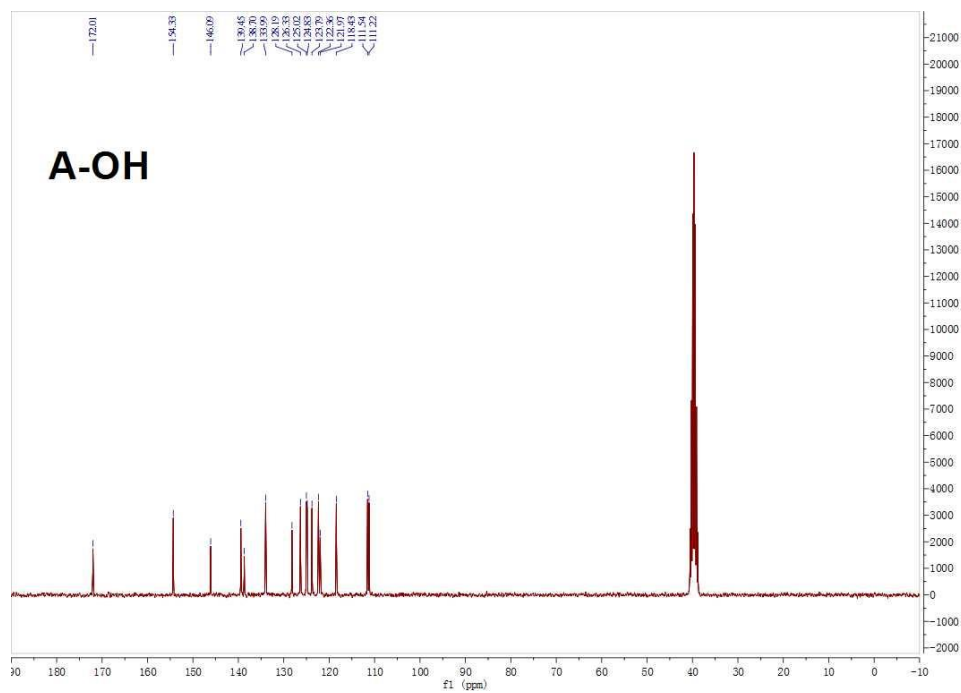

$^{13}\text{C}$  NMR spectrum of **A-OH** in  $\text{DMSO-d}_6$ .



| Sample No. <sup>Ⓢ</sup> | Formula (M) <sup>Ⓢ</sup>                                                   | Ion Formula <sup>Ⓢ</sup> | Measured m/z <sup>Ⓢ</sup> | Calc m/z <sup>Ⓢ</sup> | Diff (ppm) <sup>Ⓢ</sup> |
|-------------------------|----------------------------------------------------------------------------|--------------------------|---------------------------|-----------------------|-------------------------|
| Probe A <sup>Ⓢ</sup>    | C <sub>23</sub> H <sub>12</sub> N <sub>2</sub> O <sub>8</sub> <sup>Ⓢ</sup> | [M+H] <sup>+</sup>       | 445.0661 <sup>Ⓢ</sup>     | 445.0666 <sup>Ⓢ</sup> | -1.12 <sup>Ⓢ</sup>      |

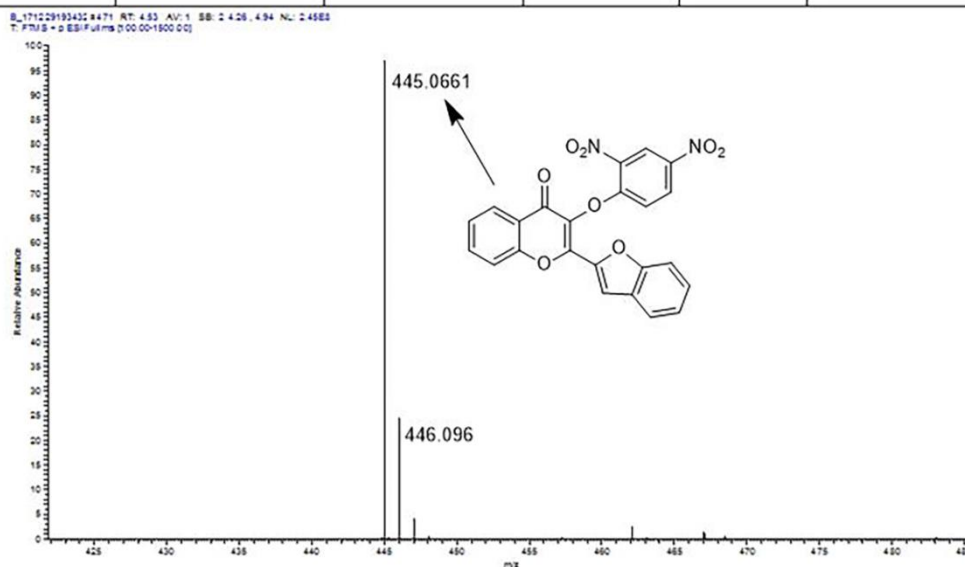

High resolution mass spectra of probe A.

## 6. Table S1

| Probe                   | Fluorophore                                    | $\lambda_{\text{ex}}/\lambda_{\text{em}}(\text{nm})$ | Response time | Detection limit     | Reference                                          |
|-------------------------|------------------------------------------------|------------------------------------------------------|---------------|---------------------|----------------------------------------------------|
| P-N <sub>3</sub>        | tetraphenylimidazole                           | 300/436                                              | 80min         | 0.19 $\mu\text{M}$  | Anal. Chim. Acta 879 (2015) 85–90                  |
| FD-NO <sub>2</sub>      | rhodol                                         | 480/518                                              | 50min         | 1 $\mu\text{M}$     | Org. Chem. Front. 1 (2014) 501–505                 |
| Probe-1                 | Fluorescein                                    | 465/515                                              | 60min         | 1–10 $\mu\text{M}$  | Angew. Chem., Int. Ed., 2011,50, 10327–10329       |
| GCTPOC-H <sub>2</sub> S | GCTPOC                                         | 410/514                                              | 40min         | 3.02 $\mu\text{M}$  | Anal. Chim. Acta 853 (2015) 548–554.               |
| HF-PBA                  | 3-Hydroxyflavone                               | 345/520                                              | 30min         | 0.075 $\mu\text{M}$ | Sensors and Actuators, B:Chemical234( 2016)231-238 |
| This work               | 2-(benzofuran-2-yl)-3-hydroxy-4H-chromen-4-one | 440/537                                              | 20min         | 0.049 $\mu\text{M}$ | The present work                                   |

Table S1 Summary of fluorescent probes for H<sub>2</sub>S
